# Supplementary material for: Un mapa y una descripción inéditos de La Plana de Castellón de 1775, utilizados por Tomás López para abrir su mapa del reino de Valencia de 1788
Source: Royal Society of Chemistry journal article supplement (doi:10.1039/c3cc39189b), 2003-01-01
Supplement: c3cc39189b.pdf [file c3cc39189b.pdf]

# **New Class of Highly Solvatochromic Dicyano Rhenate(I) Diimine Complexes – Synthesis, Photophysics and Photocatalysis**

*Larry Tso-Lun Lo, Sze-Wing Lai, Shek-Man Yiu and Chi-Chiu Ko\**

Department of Biology and Chemistry, City University of Hong Kong, Tat Chee Avenue, Kowloon,  
Hong Kong, People's Republic of China

E-mail: [vincccko@cityu.edu.hk](mailto:vincccko@cityu.edu.hk). Fax: +(852) 3442-0522. Tel: +(852) 3442-6958.

## **Supplementary Information**

## Experimental

**Materials and Reagents.** 1,10-Phenanthroline (phen), 4,4'-di-*tert*-butyl-2,2'-bipyridine (*t*Bu<sub>2</sub>bpy), potassium cyanide (KCN) and [Re<sub>2</sub>(CO)<sub>10</sub>] were purchased from Aldrich Chemical Company and used without further purification. Re(CO)<sub>5</sub>Br<sup>1</sup> and [Re(CO)<sub>3</sub>(N–N)(CN)]<sup>2</sup> (N–N = phen and *t*Bu<sub>2</sub>bpy) were synthesised according to modified literature procedures for related metal complexes. All solvents were of analytical reagent grade and were used without further purification.

**Physical Measurements and Instrumentation.** Photo-substitution reactions were carried out in a micro-photoreactor using a Pen-ray mercury lamp (11SC–1; λ = 254 nm) as the excitation source.<sup>3</sup> <sup>1</sup>H NMR spectra were recorded on a Bruker AV400 (400 MHz) FT-NMR spectrometer. Chemical shifts (δ, ppm) were reported relative to tetramethylsilane (Me<sub>4</sub>Si). All negative-ion ESI mass spectra were recorded on a PE-SCIEX API 150 EX single quadrupole mass spectrometer. The elemental analyses were performed on an Elementar Vario MICRO Cube elemental analyzer.

Electronic absorption spectra were recorded on a Hewlett-Packard 8452A diode array spectrophotometer. Solution emission measurements were recorded in the spectral mode of a Edinburgh Instruments LP920-KS using the third harmonic output (355-nm; 6-8 ns fwhm pulse width) of Spectra-Physics Quanta-Ray Q-switched LAB-150 pulsed Nd-YAG laser (10 Hz) as the excitation source. Solutions were rigorously degassed on a high-vacuum line in a two-compartment cell with no less than four successive freeze pump-thaw cycles. Steady state emission and excitation spectra at 77 K were recorded on a Horiba Jobin Yvon Fluorolog-3-TCSPC spectrofluorometer. Measurements of the EtOH–MeOH (4:1, v/v) glass samples at 77 K were carried out with the dilute EtOH–MeOH sample solutions contained in a quartz tube inside a liquid nitrogen-filled quartz optical Dewar flask.

Photocatalytic CO<sub>2</sub>-reduction was carried out in a 3-neck micro-photochemical reactor.<sup>3</sup> A solution of **1** (mM) in 4 ml of DMF/TEOA (5:1 v/v) under an atmosphere of CO<sub>2</sub> was irradiated by a Pen-Ray mercury lamp (11SC-1, 90-0019-01;  $\lambda = 365$  nm) in a water-cooled quartz jacket. The photochemical reactor was connected to an infrared gas cell with 10 cm path length to monitor the formation CO by Perkin Elmer FTIR-1600 spectrophotometer during the photo-excitation.

**X-Ray Crystal Structure Determination.** The crystal structures were determined on an Oxford Diffraction Gemini S Ultra X-ray single crystal diffractometer using graphite monochromatized Cu-K $\alpha$  radiation ( $\lambda = 1.54178$  Å). The structure was solved by direct methods employing SHELXL-97 program<sup>4</sup> on PC. Re and many non-H atoms were located according to the direct methods. The positions of other non-hydrogen atoms were found after successful refinement by full-matrix least-squares using SHELXL-97 program<sup>4</sup> on PC. In the final stage of least-squares refinement, all non-hydrogen atoms were refined anisotropically. H atoms were generated by program SHELXL-97.<sup>4</sup> The positions of H atoms were calculated based on riding mode with thermal parameters equal to 1.2 times that of the associated C atoms, and participated in the calculation of final R-indices.

**Syntheses.** All reactions were carried out under strictly anaerobic condition in an inert atmosphere of argon using standard Schlenk techniques.

*Cis,trans*-K[Re(CO)<sub>2</sub>(CN)<sub>2</sub>(<sup>t</sup>Bu<sub>2</sub>bpy)] (**1**): A mixture of [Re(CO)<sub>3</sub>(<sup>t</sup>Bu<sub>2</sub>bpy)(CN)] (100 mg, 0.18 mmol) and KCN (1150 mg, 176 mmol) was dissolved in an argon-degassed mixture of methanol and water (6:1 v/v) (21 ml). The resulting solution was then irradiated with UV light ( $\lambda = 254$  nm) for 7 hours at room temperature using a Pen-Ray mercury lamp (11SC-1) in a water-cooled quartz jacket, during which the solution gradually changed from pale yellow to dark red. After removal of the solvent under reduced pressure, the residue was dissolved in dichloromethane and filtered to remove the excess KCN. The filtrate was then purified by column chromatography on silica gel using dichloromethane/acetone/methanol (5:5:1 v/v/v) as eluent. Analytically pure deep red crystals of **1** were

obtained by slow diffusion of diethyl ether vapour into a concentrated methanolic solution of **1**. Yield: 42 mg, 0.07 mmol; 41%.  $^1\text{H}$  NMR (400 MHz,  $\text{D}_2\text{O}$ , 298 K):  $\delta$  1.25 (s, 18H,  $^t$ butyl H's), 7.42 (d, 2H,  $J$  = 5.8 Hz, 5,5'-bipyridyl H's), 8.16 (s, 2H, 3,3'-bipyridyl H's), 8.70 (d, 1H,  $J$  = 5.8 Hz, 6,6'-bipyridyl H's). Negative-ion ESI-MS:  $m/z$  563  $[\text{M}]^-$ . IR (KBr disc,  $\nu/\text{cm}^{-1}$ ): 1821, 1902  $\nu(\text{C}\equiv\text{O})$ ; 2063  $\nu(\text{N}\equiv\text{C})$ . Elemental analyses, Calcd for **1** (found) %: C 43.91 (43.98), H 4.02 (4.15), N 9.31 (9.05).

*Cis,trans*-K $[\text{Re}(\text{CO})_2(\text{CN})_2(\text{phen})]$  (**2**): The complex was synthesised according to a procedure similar to that for **1** except  $[\text{Re}(\text{CO})_3(\text{phen})(\text{CN})]$  (100 mg, 0.21 mmol) was used in place of  $[\text{Re}(\text{CO})_3(^t\text{Bu}_2\text{bpy})(\text{CN})]$  in the ligand substitution reaction. Yield: 41 mg, 0.08 mmol; 38%.  $^1\text{H}$  NMR (400 MHz,  $\text{D}_2\text{O}$ , 298 K):  $\delta$  7.73 (dd, 2H,  $J$  = 5.1, 8.2 Hz, 3,8-phenanthrolyl H's), 7.83 (s, 2H, 5,6-phenanthrolyl H's), 8.44 (d, 2H,  $J$  = 8.2 Hz, 4,7-phenanthrolyl H's), 9.22 (d, 2H,  $J$  = 5.1 Hz, 2,9-phenanthrolyl H's). Negative-ion ESI-MS:  $m/z$  476  $[\text{M}]^-$ . IR (KBr disc,  $\nu/\text{cm}^{-1}$ ): 1816, 1917  $\nu(\text{C}\equiv\text{O})$ ; 2050  $\nu(\text{N}\equiv\text{C})$ . Elemental analyses, Calcd for **2**· $\text{CH}_3\text{OH}$  (found) %: C 37.42 (37.73), H 2.22 (2.52), N 10.27 (10.08).

*Cis,trans*- $^n\text{Bu}_4\text{N}[\text{Re}(\text{CO})_2(\text{CN})_2(^t\text{Bu}_2\text{bpy})]$  (**3**): To a suspension of **1** (40 mg, 0.07 mmol) in  $\text{CH}_2\text{Cl}_2$  was added,  $^n\text{Bu}_4\text{NCl}$  (19 mg, 0.07 mmol). The resulting suspension was stirred for an hour and then filtered to remove the KCl precipitate. After removal of the solvent under reduced pressure, deep red crystals of **3** were obtained from slow diffusion of diethyl ether vapour into the concentrated acetone solution of **3**. 48 mg, 0.06 mmol; 89%.  $^1\text{H}$  NMR (400 MHz,  $\text{CDCl}_3$ , 298 K):  $\delta$  1.01 (t, 12H,  $J$  = 7.4 Hz,  $^n$ butyl H's), 1.37 (s, 18H,  $^t$ butyl H's), 1.46 (sextet, 8H,  $J$  = 7.4 Hz,  $^n$ butyl H's), 1.69 (septet, 8H,  $J$  = 7.4, 8.5 Hz,  $^n$ butyl H's), 3.32 (t, 8H,  $J$  = 8.5 Hz,  $^n$ butyl H's), 7.27 (d, 2H,  $J$  = 5.8 Hz, 5,5'-bipyridyl H's), 7.94 (s, 2H, 3,3'-bipyridyl H's), 8.93 (d, 1H,  $J$  = 5.8 Hz, 6,6'-bipyridyl H's). ESI-MS:  $m/z$  563  $[\text{M}]^-$ . IR (KBr disc,  $\nu/\text{cm}^{-1}$ ): 1828, 1906  $\nu(\text{C}\equiv\text{O})$ ; 2077  $\nu(\text{N}\equiv\text{C})$ . Elemental analyses, Calcd for **3**·0.5 $\text{CH}_3\text{COCH}_3$  (found) %: C 56.87 (56.57), H 7.61 (7.92), N 8.40 (8.26).

*Cis,trans*-<sup>n</sup>Bu<sub>4</sub>N[Re(CO)<sub>2</sub>(CN)<sub>2</sub>(phen)] (**4**): The complex was synthesised according to a procedure similar to that for **3** except **2** (40 mg, 0.08 mmol) was used in place of **1** in the metathesis. Yield: 45 mg, 0.06 mmol; 81%. <sup>1</sup>H NMR (400 MHz, CDCl<sub>3</sub>, 298 K): δ 1.01 (t, 12H, *J* = 7.4 Hz, <sup>n</sup>butyl H's), 1.46 (sextet, 8H, *J* = 7.4 Hz, <sup>n</sup>butyl H's), 1.69 (septet, 8H, *J* = 7.4, 8.5 Hz, <sup>n</sup>butyl H's), 3.37 (t, 8H, *J* = 8.5 Hz, <sup>n</sup>butyl H's), 7.66 (dd, 2H, *J* = 5.0, 8.1 Hz, 3,8-phenanthrolyl H's), 7.91 (s, 2H, 5,6-phenanthrolyl H's), 8.35 (d, 2H, *J* = 8.1 Hz, 4,7-phenanthrolyl H's), 9.38 (d, 2H, *J* = 5.0 Hz, 2,9-phenanthrolyl H's). ESI-MS: *m/z* 476 [M]<sup>-</sup>. IR (KBr disc, *v*/cm<sup>-1</sup>): 1820, 1886 *v*(C≡O); 2073 *v*(N≡C). Elemental analyses, Calcd for **4** (found) %: C 53.61 (53.45), H 6.19 (6.44), N 9.77 (10.02).

**Table S1.** Crystal and structure determination data for **3** and **4**.

|                                                            | <b>3</b>                                                                                              | <b>4</b>                                                                                                            |
|------------------------------------------------------------|-------------------------------------------------------------------------------------------------------|---------------------------------------------------------------------------------------------------------------------|
| Formula                                                    | C <sub>22</sub> H <sub>24</sub> N <sub>4</sub> O <sub>2</sub> Re·C <sub>16</sub> H <sub>36</sub> N    | C <sub>16</sub> H <sub>8</sub> N <sub>4</sub> O <sub>2</sub> Re(H <sub>2</sub> O)·C <sub>16</sub> H <sub>36</sub> N |
| <i>M<sub>r</sub></i>                                       | 805.11                                                                                                | 734.94                                                                                                              |
| <i>T</i> / K                                               | 133(2)                                                                                                | 133(2)                                                                                                              |
| <i>a</i> / Å                                               | 15.2908(4)                                                                                            | 9.9402(2)                                                                                                           |
| <i>b</i> / Å                                               | 12.3356(3)                                                                                            | 15.3605(2)                                                                                                          |
| <i>c</i> / Å                                               | 21.2687(6)                                                                                            | 21.5569(3)                                                                                                          |
| <i>α</i> / deg                                             | 90                                                                                                    | 90                                                                                                                  |
| <i>β</i> / deg                                             | 101.227(2)                                                                                            | 90                                                                                                                  |
| <i>γ</i> / deg                                             | 90                                                                                                    | 90                                                                                                                  |
| <i>V</i> / Å <sup>3</sup>                                  | 3934.96(18)                                                                                           | 3291.45(9)                                                                                                          |
| Crystal color                                              | Red                                                                                                   | Red                                                                                                                 |
| Crystal system                                             | Monoclinic                                                                                            | Orthorhombic                                                                                                        |
| Space group                                                | P2 <sub>1</sub> /n                                                                                    | P2 <sub>1</sub> 2 <sub>1</sub> 2 <sub>1</sub>                                                                       |
| <i>Z</i>                                                   | 4                                                                                                     | 4                                                                                                                   |
| <i>F</i> (000)                                             | 1656                                                                                                  | 1488                                                                                                                |
| <i>D<sub>c</sub></i> / g cm <sup>-3</sup>                  | 1.359                                                                                                 | 1.483                                                                                                               |
| Crystal dimensions / mm                                    | 0.3 × 0.3 × 0.1                                                                                       | 0.8 × 0.2 × 0.1                                                                                                     |
| <i>λ</i> / Å (graphite monochromated, Cu-K <sub>α</sub> )  | 1.5418                                                                                                | 1.5418                                                                                                              |
| Absorption coefficient / mm <sup>-1</sup>                  | 6.316                                                                                                 | 7.521                                                                                                               |
| Collection range                                           | 3.27 ≤ <i>θ</i> ≤ 71.67°<br>( <i>h</i> : -14 to 18;<br><i>k</i> : -14 to 14;<br><i>l</i> : -25 to 25) | 3.53 ≤ <i>θ</i> ≤ 71.33°<br>( <i>h</i> : -8 to 11;<br><i>k</i> : -18 to 17;<br><i>l</i> : -24 to 26)                |
| Completeness to theta                                      | 99.9%                                                                                                 | 99.8 %                                                                                                              |
| No. of data collected                                      | 16058                                                                                                 | 12936                                                                                                               |
| No. of unique data                                         | 7017                                                                                                  | 5694                                                                                                                |
| No. of data used in refinement, <i>m</i>                   | 6575                                                                                                  | 5631                                                                                                                |
| No. of parameters refined, <i>p</i>                        | 434                                                                                                   | 374                                                                                                                 |
| <i>R</i> <sup>a</sup>                                      | 0.0267                                                                                                | 0.0297                                                                                                              |
| <i>wR</i> <sup>a</sup>                                     | 0.0753                                                                                                | 0.0847                                                                                                              |
| Goodness-of-fit, <i>S</i>                                  | 1.031                                                                                                 | 1.078                                                                                                               |
| Maximum shift, ( <i>Δ</i> / <i>σ</i> ) <sub>max</sub>      | 0.005                                                                                                 | 0.001                                                                                                               |
| Residual extrema in final difference map, eÅ <sup>-3</sup> | +3.449, -1.141                                                                                        | +1.140, -0.763                                                                                                      |

<sup>a</sup>*w* = 1 / [*σ*<sup>2</sup>(*F<sub>o</sub>*<sup>2</sup>) + (*ap*)<sup>2</sup> + *bP*], where *P* = [2*F<sub>c</sub>*<sup>2</sup> + Max(*F<sub>o</sub>*<sup>2</sup>, 0)] / 3

**Table S2.** Selected bond distances (Å) and angles (°) with estimated standard deviations (e.s.d.s) in parentheses for **3** and **4**.

|          |                 |            |                 |           |
|----------|-----------------|------------|-----------------|-----------|
| <b>3</b> | Re(1)–C(1)      | 2.115 (3)  | C(3)–O(1)       | 1.172 (4) |
|          | Re(1)–C(2)      | 2.097 (3)  | C(4)–O(2)       | 1.174 (4) |
|          | Re(1)–C(3)      | 1.886 (3)  | C(1)–N(1)       | 1.154 (4) |
|          | Re(1)–C(4)      | 1.881 (3)  | C(2)–N(2)       | 1.155 (4) |
|          | N(3)–Re(1)–N(4) | 74.1 (3)   | Re(1)–C(3)–O(1) | 176.8 (2) |
|          | Re(1)–C(1)–N(1) | 177.0 (3)  | Re(1)–C(4)–O(2) | 177.2 (2) |
|          | Re(1)–C(2)–N(2) | 178.0 (2)  |                 |           |
| <b>4</b> | Re(1)–C(1)      | 2.116 (4)  | C(3)–O(2)       | 1.166 (7) |
|          | Re(1)–C(2)      | 2.129 (4)  | C(4)–O(1)       | 1.168 (7) |
|          | Re(1)–C(3)      | 1.897 (6)  | C(1)–N(1)       | 1.114 (7) |
|          | Re(1)–C(4)      | 1.883 (6)  | C(2)–N(2)       | 1.103 (7) |
|          | N(3)–Re(1)–N(4) | 74.95 (16) | Re(1)–C(3)–O(1) | 178.3 (6) |
|          | Re(1)–C(1)–N(1) | 178.0 (5)  | Re(1)–C(4)–O(2) | 176.4 (5) |
|          | Re(1)–C(2)–N(2) | 175.5 (5)  |                 |           |

**Table S3.** UV-vis absorption data of complexes **1–4** recorded in different solvent media.

|          | Medium                          | Absorption $\lambda_{\text{abs}}/ \text{nm}$ ( $\epsilon / \text{dm}^3\text{mol}^{-1}\text{cm}^{-1}$ ) |
|----------|---------------------------------|--------------------------------------------------------------------------------------------------------|
| <b>1</b> | THF                             | -- <sup>a</sup>                                                                                        |
|          | DMF                             | 292 (16895), 300 (21255), 360 (5075), 491 (3720)                                                       |
|          | DMSO                            | 293 (18595), 299 (19085), 360 (3955), 475 (2665)                                                       |
|          | CH <sub>2</sub> Cl <sub>2</sub> | 245 (10510), 298 (12675), 333 (4520), 450 (2975)                                                       |
|          | Acetone                         | 354 (4410), 477 (3115)                                                                                 |
|          | EtOH                            | 243 sh (15685), 290 (19540), 296 (20090), 345 (4725), 457 (3260)                                       |
|          | MeCN                            | 205 (38575), 245 sh (12025), 289 (14295), 298 (17770), 351 (4260), 469 (3145)                          |
|          | MeOH                            | 245 sh (13865), 296 (19395), 339 (4840), 450 (3525)                                                    |
|          | H <sub>2</sub> O                | 206 (42770), 243 sh (13925), 294 (17430), 400 (3380)                                                   |
| <b>2</b> | THF                             | -- <sup>a</sup>                                                                                        |
|          | DMF                             | 287 sh (10240), 496(3180)                                                                              |
|          | DMSO                            | 270 (21880), 291 sh (9115), 480 (2695)                                                                 |
|          | CH <sub>2</sub> Cl <sub>2</sub> | -- <sup>a</sup>                                                                                        |
|          | Acetone                         | 504 (3050)                                                                                             |
|          | EtOH                            | 225 (29520), 267 (23775), 287 sh (9000), 463 (2570)                                                    |
|          | MeCN                            | 199 (37350), 224 (32575), 266 (26085), 287 sh (9780), 472 (2775)                                       |
|          | MeOH                            | 223 (27330), 267 (22630), 285 sh (8385), 455 (2830)                                                    |
|          | H <sub>2</sub> O                | 201 (23415), 222 (18790), 265 (13485), 286 sh (5215), 400 (1905)                                       |
| <b>3</b> | THF                             | 294 (22510), 300 (22250), 366 (3690), 506 (2660)                                                       |
|          | DMF                             | 293 (15622), 299 (19105), 359 (4475), 489 (3260)                                                       |
|          | DMSO                            | 300 (17540), 354 (4335), 473 (3180)                                                                    |
|          | CH <sub>2</sub> Cl <sub>2</sub> | 248 sh (11670), 300 (15760), 352 (3910), 476 (2750)                                                    |
|          | Acetone                         | 360 (3490), 495 (3210)                                                                                 |
|          | EtOH                            | 244 sh (13760), 289 (15860), 296 (18895), 348 (4715), 459 (3370)                                       |
|          | MeCN                            | 204 (42410), 244 sh (13030), 291 (15470), 297 (18415), 347 (4360), 470 (3175)                          |
|          | MeOH                            | 241 sh (15740), 295 (20910), 342 (5255), 448 (3815)                                                    |
|          | H <sub>2</sub> O                | 211 (33430), 243 sh (13540), 294 (16960), 402 (3005)                                                   |
| <b>4</b> | THF                             | -- <sup>a</sup>                                                                                        |
|          | DMF                             | 271(22930), 290 sh (9325), 494 (3890)                                                                  |
|          | DMSO                            | 271 (20710), 291 sh (9265), 484 (3765)                                                                 |
|          | CH <sub>2</sub> Cl <sub>2</sub> | 270 (20890), 289 sh (7135), 483 (2855)                                                                 |
|          | Acetone                         | 509 (3505)                                                                                             |
|          | EtOH                            | 224 (30415), 268(26680), 287 sh (8700), 465 (2725)                                                     |
|          | MeCN                            | 200 (29690), 224(23400), 268 (20940), 286 sh (7105), 477 (2895)                                        |
|          | MeOH                            | 223(35300), 267 (30650), 286 sh (9965), 457 (4365)                                                     |
|          | H <sub>2</sub> O                | 201(29100), 221 (22680), 267 (17605), 288 sh (5655), 403 (2385)                                        |

<sup>a</sup>Due to limited solubility, the absorption data cannot be accurately determined.



**Table S4.** Emission data of complexes **1–4**.

|          | Medium (T/K)                          | Emission $\lambda_{em}/$ nm ( $\tau/\mu$ s) | $\phi_{em}^a$   |
|----------|---------------------------------------|---------------------------------------------|-----------------|
| <b>1</b> | CH <sub>2</sub> Cl <sub>2</sub> (298) | 650 (< 0.01)                                | 0.0002          |
|          | Glass <sup>b</sup> (77)               | 620 (0.083)                                 |                 |
| <b>2</b> | CH <sub>2</sub> Cl <sub>2</sub> (298) | -- <sup>c</sup>                             | -- <sup>c</sup> |
|          | Glass <sup>b</sup> (77)               | 647 (0.14)                                  |                 |
| <b>3</b> | CH <sub>2</sub> Cl <sub>2</sub> (298) | 667 (< 0.01)                                | -- <sup>d</sup> |
|          | Glass <sup>b</sup> (77)               | 638 (0.095)                                 |                 |
| <b>4</b> | CH <sub>2</sub> Cl <sub>2</sub> (298) | 646 (< 0.01)                                | -- <sup>d</sup> |
|          | Glass <sup>b</sup> (77)               | 655 (0.14)                                  |                 |

<sup>a</sup>The luminescence quantum yield with excitation at 436 nm. <sup>b</sup>EtOH/MeOH (4:1 v/v). <sup>c</sup>Due to limited solubility, the emission data cannot be determined. <sup>d</sup>The luminescence quantum yield is  $< 1 \times 10^{-4}$ , which cannot be accurately determined.

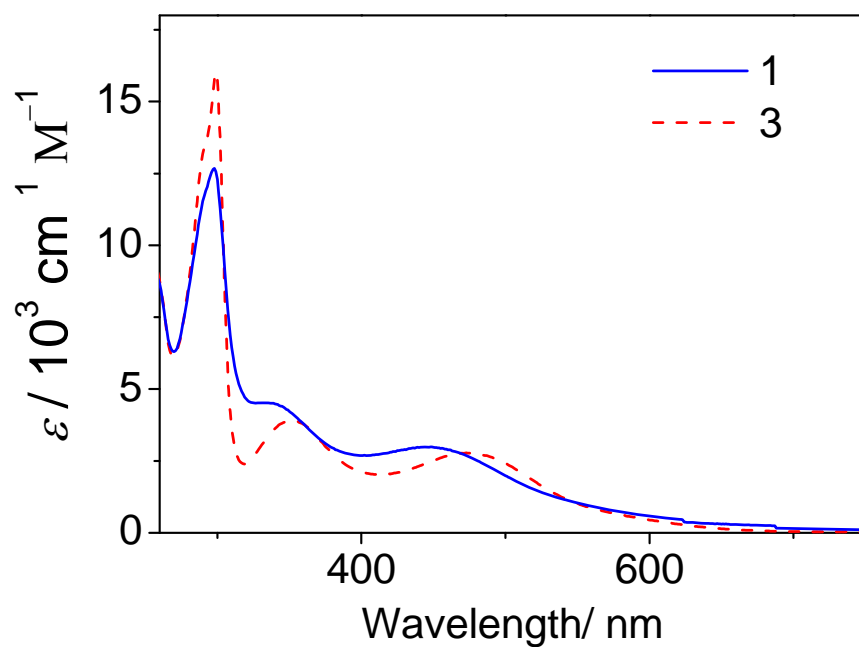

**Fig. S1** Overlaid absorption spectra of **1** and **3** in CH<sub>2</sub>Cl<sub>2</sub> solution at 298 K.

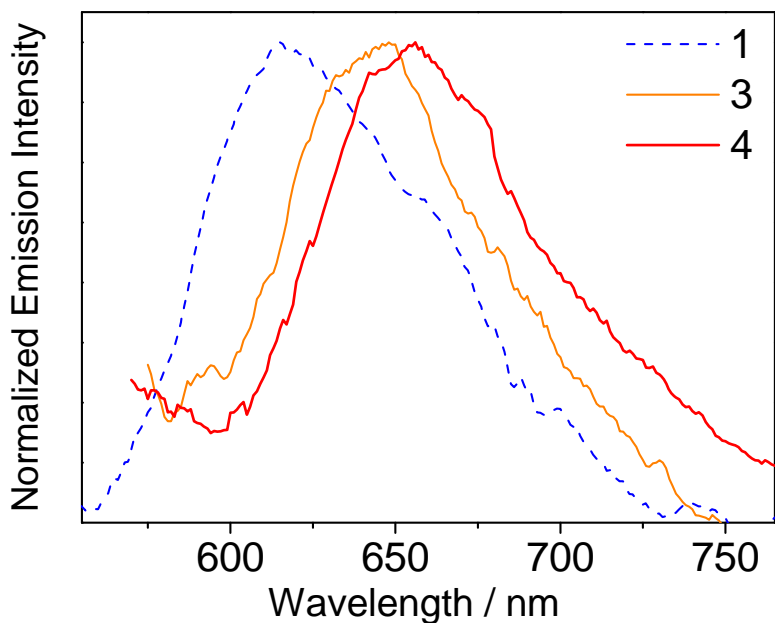

**Fig. S2** Normalized emission spectra of **1**, **3** and **4** in rigid EtOH/MeOH (4:1, v/v) glassy medium at 77K.

## References:

1. S. P. Schmidt, W. C. Trogler, F. Basolo, M. A. Urbancic and J. R. Shapley, *Inorg. Synth.*, 1990, **28**, 160.
2. R. M. Leasure, L. Sacksteder, D. Nesslerodt, G. A. Reitz, J. N. Demas and B. A. DeGraff, *Inorg. Chem.*, 1991, **30**, 3722.
3. (a) J. H. Penn and R. D. Orr, *J. Chem. Educ.*, 1989, **66**, 86; (b) C.-C. Ko, L. T.-L. Lo, C.-O. Ng and S.-M. Yiu, *Chem. Eur. J.*, 2010, **16**, 13773.
4. SHELX-97, Sheldrick, G. M. (1997). SHELX-97: Programs for Crystal Structure Analysis (Release 97-2). University of Göttingen, Germany.
